**RESPIRATORY ACIDOSIS** The pattern of renal and cellular responses of electrolytes to chronic respiratory acidosis was studied in rats. Urinary acid excretion increases transiently for the first day or two and then returns to control values despite continued severe respiratory acidosis. A rise in urine pH appears to be chiefly responsible for the rapid return of urinary ammonia to control values. This is presumably due to increased bicarbonate excretion as serum bicarbonate reaches maximal values. Renal glutaminase is not activated during respiratory acidosis. This is strong evidence against the role of intracellular or extracellular pH as regulatory factors in the adaptation of renal ammonia-producing enzymes. Adaptation of renal carbonic anhydrase does not occur in spite of increased tubular bicarbonate reabsorption. Chloride excretion is greatly elevated the first day of respiratory acidosis but thereafter returns to control values. Potassium excretion is also markedly elevated the first day and continues to be excreted at a slightly increased rate. Muscle sodium and potassium are slightly decreased after eleven days of respiratory acidosis. The most striking change in bone electrolytes is a fall in magnesium content. (Carter, N. W., Seldin, D. W., and Teng, H. C.: *Tissue and Renal Response to Chronic Respiratory Acidosis*, *J. Clin. Invest.* 38: 949 (June) 1959.)

**RESPIRATORY OBSTRUCTION** Endotracheal anesthesia was administered to a patient for Cesarean section. On connecting the corrugated tubing to the endotracheal tube, it was impossible to inflate the patient's lung, and cyanosis developed. The cause could not be ascertained. The tube was finally removed and another inserted, following which there were no difficulties. The first tube was examined. The lumen contained a broken cleaning brush causing complete occlusion. (Jenkins, A. V.: *Unexpected Hazard of Anaesthesia*, *Lancet* 1: 761 (April 11) 1959.)

**PULMONARY FUNCTION** The means by which exercise increases the pulmonary diffusing capacity for carbon monoxide in normal subjects has been studied using both the steady state and breath holding techniques.

Increase in cardiac output produced by means other than exercise caused no significant change in the diffusing capacity for carbon monoxide as measured by either of these techniques. Steady state diffusing capacity for carbon monoxide was found to be very sensitive to the ventilation rate, and by hyperventilation alone was increased as much as by exercise at the same minute ventilation. The breath-holding diffusing capacity was not affected by hyperventilation preceding the experiment. The effect of increased ventilation can explain the increase in the steady state diffusing capacity with exercise, but an adequate explanation for the increase in breath-holding diffusing capacity which occurs during exercise is not obtained. (Ross, J. C., Frayser, R., and Hickam, J. B.: *Study of Mechanism by Which Exercise Increases the Pulmonary Diffusing Capacity for Carbon Monoxide*, *J. Clin. Invest.* 38: 916 (June) 1959.)

**RENAL FUNCTION** The effect of continuous pressure breathing (positive or negative) upon renal function and water clearance was studied in 12 normal volunteers. Positive pressure breathing produces a decrease in urine flow resulting primarily from a decrease in free water clearance, with decrease in glomerular filtration rate as a contributing factor. Negative pressure breathing is associated with an increase in free water clearance with resultant increase in the rate of urine flow without changes on glomerular filtration rate. Administration of alcohol during water diuresis causes partial or complete inhibition of the antidiuretic effect of positive pressure breathing even though the change in glomerular filtration rate is similar to the group with water diuresis. During osmotic diuresis there is no antidiuresis during or following positive pressure breathing, although there were decreases in glomerular filtration rate. The administration of vasopressin prevents the diuresis in response to negative pressure breathing. Alterations in electrolyte excretion and renal hemodynamics occur during positive pressure breathing, but are not of the magnitude or in ways in the direction of the changes in water clearance and rate of urine flow. On the other hand, electrolyte excretion and renal hemo-

Downloaded from http://ajph.aphspublishers.org/ at 06:09:12 on 06:09:12 by guest on March 22, 2024
